# Supplementary material for: Neural and endocranial anatomy of Triassic phytosaurian reptiles and convergence with fossil and modern crocodylians
Source: PeerJ journal article supplement (doi:10.7717/peerj.2251), 2016-07-21

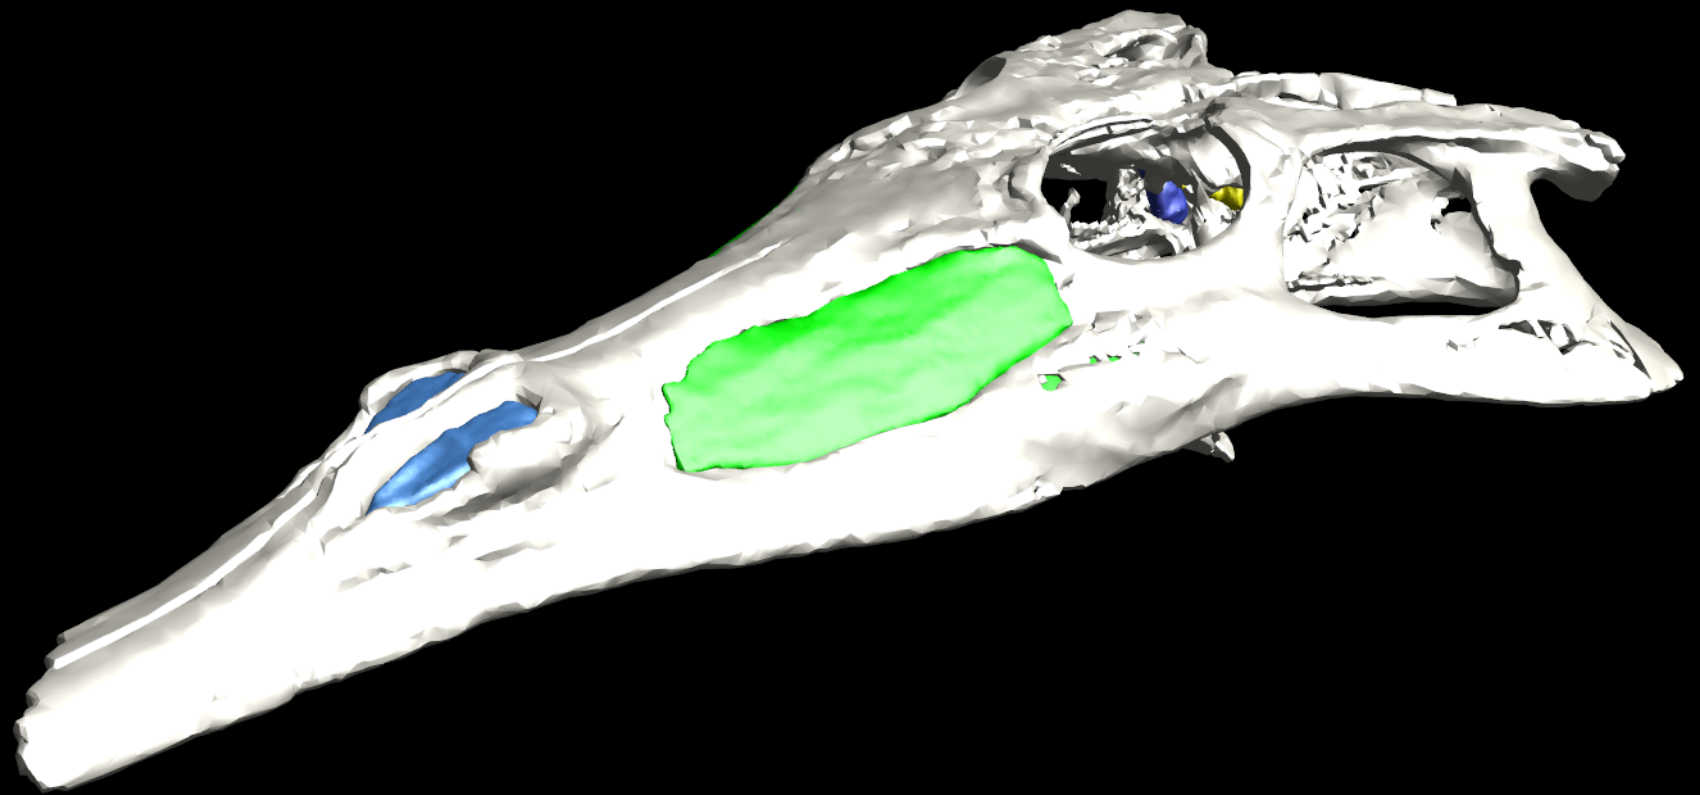

Supplement: 3D_PDF_of_Parasuchus_angustifrons.pdf [file 3D_PDF_of_Parasuchus_angustifrons.pdf]
